# Supplementary material
Source: PubMed Central journal article supplement (PMC2703537)
Supplement: en.2008-1482_3.pdf [file en.2008-1482_3.pdf]

**TABLE S1:** Mouse-specific primers used for quantitative real-time, RT-PCR

| <u>GENE</u>          | <u>Genbank<br/>Accession #</u> | <u>Primer<br/>Sequence</u>                                       | <u>Nucleotide<br/>Position</u> | <u>Product<br/>Size</u> |
|----------------------|--------------------------------|------------------------------------------------------------------|--------------------------------|-------------------------|
| <b>Ki67</b>          | XM_133912                      | Sense: ACAGACTTGCTCTGGCCTACC<br>Antisense: CTCCTCTTGGTTGGCGTTT   | Sn 1574<br>As 1769             | 196                     |
| <b>Men1</b>          | AF130368                       | Sense: CCACCTGCTGCGATTTTATG<br>Antisense: TCTGCTTCCC GGCTAACTATG | Sn 1637<br>As 1792             | 156                     |
| <b>P27</b>           | NM_009875.3                    | Sense: CGGTGCCTTTAATTGGGTCT<br>Antisense: CTGTTCTGTTGGCCCTTTTGT  | Sn 849<br>As 1016              | 168                     |
| <b>Pttg1</b>         | NM_013917.1                    | Sense: GCCTAAAGCCAGCAGAAAGG<br>Antisense: TCATCAGGAGCAGGAACAGAA  | Sn 470<br>As 628               | 159                     |
| <b>sst1</b>          | NM_009216.3                    | Sense: TGCCCTTTCTGGTCACTTCC<br>Antisense: AGCGGTCCACACTAAGCACA   | Sn 757<br>As 891               | 135                     |
| <b>sst2</b>          | NM_009217.2                    | Sense: TGATCCTCACCTATGCCAACA<br>Antisense: CTGCCTTGACCAAGCAAAGA  | Sn 893<br>As 997               | 105                     |
| <b>sst5</b>          | NM_011425.2                    | Sense: ACCCCCTGCTCTATGGCTTT<br>Antisense: GCTCTATGGCATCTGCATCCT  | Sn 1215<br>As 1319             | 105                     |
| <b>Slc6a11</b>       | NM_144512.2                    | Se: AGGGTGGCTCCTAGCTCTGT<br>As: CAGTTGGCTCTGGTTGGTTC             | 1638<br>1789                   | 152                     |
| <b>Casp1</b>         | NM_009807.2                    | Se: GCCTGGTCTTGTGACTTGGA<br>As: ATGTCCC GGGAAGAGGTAGA            | 1275<br>1406                   | 132                     |
| <b>Map2K1</b>        | NM_008927.3                    | Sense: TGCTGAGTTGCAGGCTCTTT<br>Antisense: TCCAGCTCCTCCAGCTTCTT   | Sn 282<br>As 435               | 154                     |
| <b>LAPTM4a</b>       | NM_008640.2                    | Sense: TCGTCCTTGTGTTCTTTGTGG<br>Antisense: GGCAATCTCTGGCACATTTCT | Sn 1368<br>As 1474             | 107                     |
| <b>TNFR2</b>         | NM_011610.3                    | Sense: AAGGGTGGCATCTCTCTTCC<br>Antisense: AGGCACCTTGGCATCTCTTT   | Sn 835<br>As 975               | 141                     |
| <b>18S</b>           | X00686                         | Sense: TGACTCAACACGGGAAACCT<br>Antisense: AACCAGACAAATCGCTCCAC   | Sn 1244<br>As 1368             | 125                     |
| <b>HPRT</b>          | NM_013556.2                    | Sense: CAGTCAACGGGGACATAAA<br>Antisense: AGAGGTCCTTTTCACCAGCAA   | Sn 471<br>As 653               | 183                     |
| <b>Cyclophilin A</b> | NM_0008907.1                   | Sense: TGGTCTTTGGGAAGGTGAAAG<br>Antisense: TGTCCACAGTCGGAAATGGT  | Sn 421<br>As 529               | 109                     |
| <b>GAPDH</b>         | NM_008084.2                    | Sense: ATGGCCTTCCGTGTTCTTAC<br>Antisense: GCCTGCTTACCACCTTCTT    | Sn 735<br>As 838               | 104                     |
| <b>Beta-actin</b>    | M12481                         | Sense: CTGGGACGACATGGAGAAGA<br>Antisense: ACCAGAGGCATACAGGGACA   | Sn 156<br>As 360               | 205                     |
