# Supplementary material
Source: PubMed Central journal article supplement (PMC2703537)
Supplement: en.2008-1482_4.pdf [file en.2008-1482_4.pdf]

**TABLE S2:** Absolute cDNA copy number / 0.05  $\mu$ g total RNA of gene transcripts in the pituitary of 4- and  $\geq$  10-month old WT and Tg male mice, as determined by quantitative real-time RT-PCR.

|                      | <b>MALES</b>           |                        |                                   |                         |
|----------------------|------------------------|------------------------|-----------------------------------|-------------------------|
|                      | <b>WT<br/>4 months</b> | <b>Tg<br/>4 months</b> | <b>WT<br/>10 months</b>           | <b>Tg<br/>10 months</b> |
| <b>HPRT</b>          | 40149 $\pm$ 4428       | 22275 $\pm$ 3186       | 45119 $\pm$ 5977                  | 28266 $\pm$ 8513        |
| <b>18S</b>           | 403E+06 $\pm$ 31E+06   | 292E+06 $\pm$ 45E+06   | 380E+06 $\pm$ 43E+06              | 276E+06 $\pm$ 30E+06    |
| <b>Cyclophilin A</b> | 161515 $\pm$ 21974     | 82622 $\pm$ 13066**    | 166855 $\pm$ 22528                | 72209 $\pm$ 9479**      |
| <b>GAPDH</b>         | 874076 $\pm$ 97031     | 409640 $\pm$ 57158*    | 1061571 $\pm$ 97315               | 426992 $\pm$ 156837**   |
| <b>Beta-actin</b>    | 2523570 $\pm$ 264575   | 1219286 $\pm$ 310293   | 4075316 $\pm$ 598383 <sup>a</sup> | 1107924 $\pm$ 325475**  |

Values are indicated as SEM  $\pm$  error. **a**, represents values that differ from age-matched WT controls ( $P < 0.05$ ) and asterisks (\*,  $P < 0.05$ ; \*\*,  $P < 0.01$ ), indicates values that significantly differ between age within genotype.
