# Supplementary material
Source: PubMed Central journal article supplement (PMC2703537)

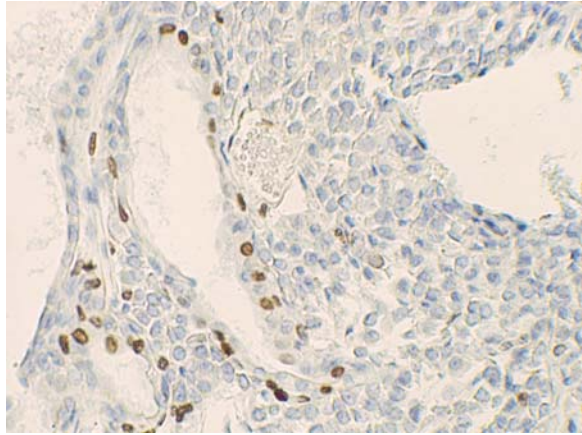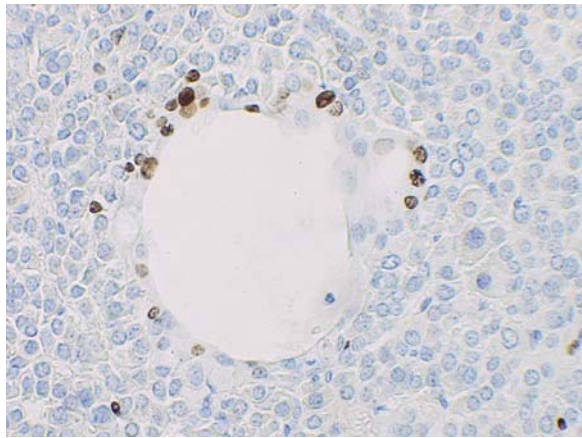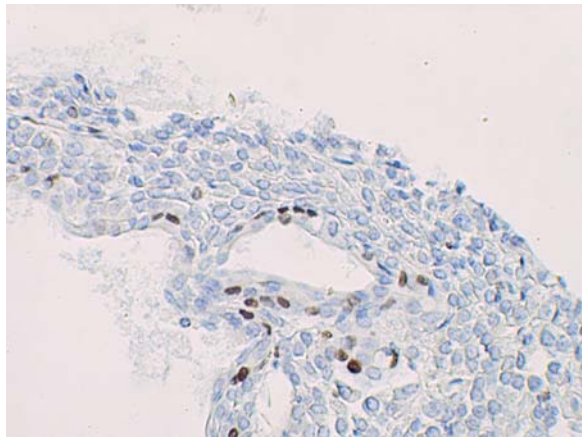

**Fig. S1**

Supplement: en.2008-1482_1.pdf [file en.2008-1482_1.pdf]

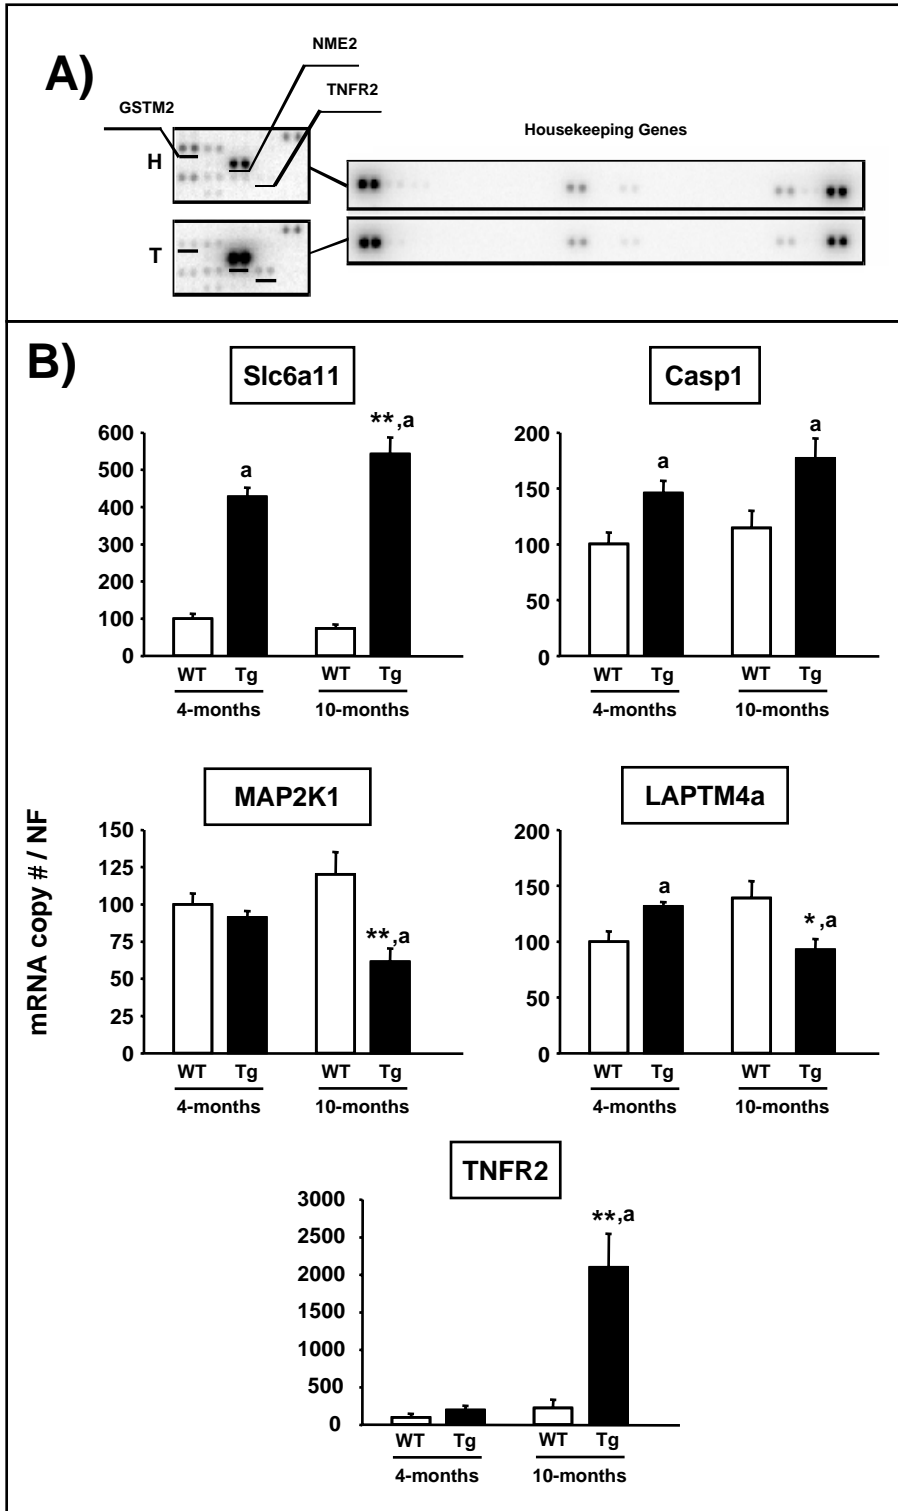

Fig. S2

Supplement: en.2008-1482_2.pdf [file en.2008-1482_2.pdf]
